# Supplementary material
Source: PubMed Central journal article supplement (PMC4047730)
Supplement: SD3.pdf [file SD3.pdf]

SUPPLEMENTAL TABLE 1

Model-averaged coefficients of factors associated with *Trypanosoma cruzi* infection in dogs born before residual spraying with insecticides of all houses in Pampa del Indio in 2008

| Variable                                                             | Coefficient | Standard error | z    | P    | 95% Confidence interval |       |
|----------------------------------------------------------------------|-------------|----------------|------|------|-------------------------|-------|
|                                                                      |             |                |      |      | Low                     | High  |
| Intercept                                                            | -2.24       | 0.34           | 6.67 | 0.00 | -2.90                   | -1.58 |
| Age (months)                                                         | 0.01        | 0.00           | 3.32 | 0.00 | 0.01                    | 0.02  |
| Infected bug abundance in<br>domiciles, kitchens,<br>and storerooms  |             |                |      |      |                         |       |
| 0                                                                    | -0.22       | 0.39           | 0.56 | 0.58 | -0.99                   | 0.55  |
| 1-9                                                                  | 0.46        | 0.35           | 1.30 | 0.19 | -0.23                   | 1.14  |
| ≥ 10                                                                 | 1.80        | 0.66           | 2.71 | 0.01 | 0.50                    | 3.09  |
| Number of infected dogs<br>or cats with which the<br>dog cohabitated |             |                |      |      |                         |       |
| 1                                                                    | 0.46        | 0.35           | 1.31 | 0.19 | -0.23                   | 1.15  |
| ≥ 2                                                                  | 2.10        | 0.41           | 5.13 | 0.00 | 1.30                    | 2.90  |
| Ethnic group                                                         |             |                |      |      |                         |       |
| Toba                                                                 | 0.48        | 0.33           | 1.44 | 0.15 | -0.17                   | 1.13  |
| Sex                                                                  |             |                |      |      |                         |       |
| Female                                                               | 0.09        | 0.32           | 0.29 | 0.77 | -0.54                   | 0.73  |
| Domestic resting habit                                               |             |                |      |      |                         |       |
| Yes                                                                  | 0.02        | 0.33           | 0.08 | 0.94 | -0.61                   | 0.66  |

Variables (detailed in the text): age, reconstructed age (months), infected bug abundance in domiciles, kitchens, and storerooms (four levels), number of *T. cruzi*-infected dogs or cats with which the animal cohabited (three levels), ethnic background of the animal's household (Toba or Creole), sex (two levels), and whether the dog rested in domiciles, kitchens, or storerooms (two levels). Reference levels were the lowest age group, no infestation at the dog's household, not cohabiting with an infected animal, males, Creoles, and no domestic resting habit.
